# Supplementary material for: Racial and Ethnic Inequities in US Oncology Clinical Trial Participation From 2017 to 2022
Source: PubMed Central journal article supplement — JAMA Netw Open. 2023 Jul 21;6(7):e2322515. doi: 10.1001/jamanetworkopen.2023.22515 (PMC10362465; doi:10.1001/jamanetworkopen.2023.22515), 2023-07-21
Supplement: jamanetwopen-e2322515-s001.pdf [file jamanetwopen-e2322515-s001.pdf]

## Supplemental Online Content

Pittell H, Calip GS, Pierre A, et al. Racial and ethnic inequities in US oncology clinical trial participation from 2017 to 2022. *JAMA Netw Open*. 2023;6(7):e2322515.  
doi:10.1001/jamanetworkopen.2023.22515

### **eTable.** Attrition Table

This supplemental material has been provided by the authors to give readers additional information about their work.

**eTable. Attrition Table**

| <b>Criterion</b>                                                                                                                                                                                                               | <b>Patients</b> |
|--------------------------------------------------------------------------------------------------------------------------------------------------------------------------------------------------------------------------------|-----------------|
| 1. Patients in the Flatiron Health Research Database with confirmed diagnosis of Advanced Non-Small Cell Lung Cancer, Metastatic Breast Cancer, Metastatic Colorectal Cancer Multiple Myeloma, or Metastatic Pancreatic Cancer | 184,728         |
| 2. Age 18 or older at clinical diagnosis                                                                                                                                                                                       | 184,720         |
| 3. Clinical diagnosis between January 1, 2017 and May 31, 2022                                                                                                                                                                 | 94,893          |
| 4. Has at least one line-of-therapy (per oncologist-defined, rule-based lines of therapy)                                                                                                                                      | 75,423          |
| 5. Patients unlikely to have received treatment at other facilities prior to referral in the Flatiron Health network                                                                                                           | 74,443          |
| 6. Documented race/ethnicity                                                                                                                                                                                                   | 55,590          |
| 7. Documented race/ethnicity of Latinx, Non-Latinx Black, or Non-Latinx White <sup>1</sup>                                                                                                                                     | 50,411          |

---

<sup>1</sup> Among the patients excluded between Criterion 6 and 7, a total of 1,643 patients had a recorded race of Asian and a total of 3591 patients had a recorded race of "Other Race". As part of its de-identification process, Flatiron masks specific race categories with lower representation in the U.S. population by mapping them as follows: American Indian or Alaska Native is mapped to "Other Race"; Hawaiian or Pacific Islander is mapped to "Other Race"; Source data that contains a race description which falls in multiple race categories is mapped to "Other Race".
