# Supplementary material for: Racial and Ethnic Inequities in US Oncology Clinical Trial Participation From 2017 to 2022
Source: PubMed Central journal article supplement — JAMA Netw Open. 2023 Jul 21;6(7):e2322515. doi: 10.1001/jamanetworkopen.2023.22515 (PMC10362465; doi:10.1001/jamanetworkopen.2023.22515), 2023-07-21
Supplement: jamanetwopen-e2322515-s002.pdf [file jamanetwopen-e2322515-s002.pdf]

## Data Sharing Statement

Pittell. Racial and Ethnic Inequities in US Oncology Clinical Trial Participation From 2017 to 2022. *JAMA Netw Open*. Published July 21, 2023. doi:10.1001/jamanetworkopen.2023.22515

### Data

**Data available:** No

### Additional Information

**Explanation for why data not available:** We include the following data sharing statement in our manuscript: "The data that support the findings of this study have been originated by Flatiron Health, Inc. Requests for data sharing by license or by permission for the specific purpose of replicating results in this manuscript can be submitted to [dataaccess@flatiron.com](mailto:dataaccess@flatiron.com)."
